# Supplementary material for: An all-organic symmetric battery based on a triquinoxalinylene derivative with different redox voltage active sites and a large conjugation system
Source: Royal Society of Chemistry journal article supplement (doi:10.1039/d1ta06228j), 2021-01-01
Supplement: d1ta06228j1.pdf [file d1ta06228j1.pdf]

## Supporting Information

# **An all-organic symmetric battery base on a triquinoxalinylene derivative with different redox voltage active sites and large conjugation system**

Yi Zhang<sup>a</sup>, Zhaopeng Sun<sup>a</sup>, Xiangyue Kong<sup>a</sup>, Yilin Lin<sup>a</sup> and Weiwei Huang<sup>a,b\*</sup>

<sup>a</sup> School of Environmental and Chemical Engineering, Yanshan University, Qinhuangdao 066004, China

<sup>b</sup> Key Laboratory of Advanced Energy Materials Chemistry (Ministry of Education), College of Chemistry, Nankai University, Tianjin, 300071, China

\*Corresponding author.

E-mail address: huangweiwei@ysu.edu.cn (W. Huang)

## Contents

### 1. The structural characterization of 3Q and 3BQ

Fig. S1. The ESI-MS spectra of (a) 3Q and (b) 3BQ.

Fig. S2. The FTIR spectrums of (a) 3Q and (b) 3BQ.

Fig. S3. The  $^1\text{H}$  NMR spectrums of (a) 3Q ( $\text{CDCl}_3$ ) and (b) 3BQ ( $\text{DMSO}-d_6$ ).

### 2. The morphology characterization of 3Q and 3BQ

Fig. S4. SEM images of 3Q and 3BQ.

### 3. Electrochemical performance of 3BQ and 3Q cathodes

Fig. S5. Schematic of the optimized structure of 3BQ.

Fig. S6. CV curve of 3Q at a scan rate of  $0.2 \text{ mV s}^{-1}$ .

Fig. S7. The electrochemical redox mechanism of 3Q.<sup>1</sup>

Fig. S8. Cycle performance of 3BQ with different Ketjen Black content at 0.2 C.

Fig. S9. Electrochemical performance of 3BQ cathode in Li-ion half-cell between 1.3 and 3.9 V (vs Li/Li<sup>+</sup>) in 1 M LiTFSI in DOL/DME (1/1, v/v). (a) Rate performance at different current densities; (b) cycling performance at 1 C.

Fig. S10. (a) Cycle performance and (b) charge-discharge curves of 3BQ cathode at 0.2 C.

Fig. S11. Cyclic performance of Ketjen Black in different voltage ranges (Ketjen Black : PVDF = 9:1).

Fig. S12. Charge-discharge curves of 3Q at different rates.

Fig. S13. The Nyquist plots of 3Q and 3BQ as cathodes during the cycles.

### 4. Lithium storage mechanism of 3BQ cathode

Fig. S14. The optimized structure of 3BQ-xLi ( $x=1\sim 12$ ) based on DFT calculation at the B3LYP/6-311G (d, p).

Fig. S15. Ex-situ XRD patterns of 3BQ cathode at different states.

### 5. Electrochemical performance of 3BQ anode

Fig. S16. The CV curves of 3BQ anode in the voltage range of 0.01~3 V at a scan rate of  $0.2 \text{ mV s}^{-1}$ .

Fig. S17. The charge-discharge curves of 3BQ anode in the initial 3 cycles at a current density of  $50 \text{ mA g}^{-1}$ .

Fig. S18. Proposed superlithiation reaction mechanism of 3BQ anode.

Fig. S19. (a) Rate performance and (b) charge-discharge curves of 3BQ anode at different current densities.

Fig. S20. Cycle performance of 3BQ anode at  $2500 \text{ mA g}^{-1}$  for 500 cycles.

### 6. Charge-discharge curves of all-organic symmetric batteries with different mass ratios of anode and cathode

Fig. S21. Charge-discharge curves at different mass ratios of anode and cathode at 0.2 C.

### 7. Comparison of electrochemical performance of other organic cathodes

**Table S1.** Comparison of electrochemical performance of other organic cathodes.

## **8. Computational details**

**Table S2.** The total energies and the binding energies ( $\Delta E$ ) in Hartree (eV) calculated at the B3LYP/6-311G (d, p) level in EC/DMC solvent.

**Table S3.** Sum of electronic and thermal Gibb free energies in Hartree (eV) of optimized structures and the redox potentials (V) calculated at the B3LYP/6-311G (d, p) level in EC/DMC solvent.

## **9. Comparison of electrochemical performance of other all-organic batteries**

**Table S4.** Comparison of electrochemical performance of other all-organic batteries.

**Equation S1.** Lithium ion diffusion coefficient for **3Q** and **3BQ**.

## **10. References**

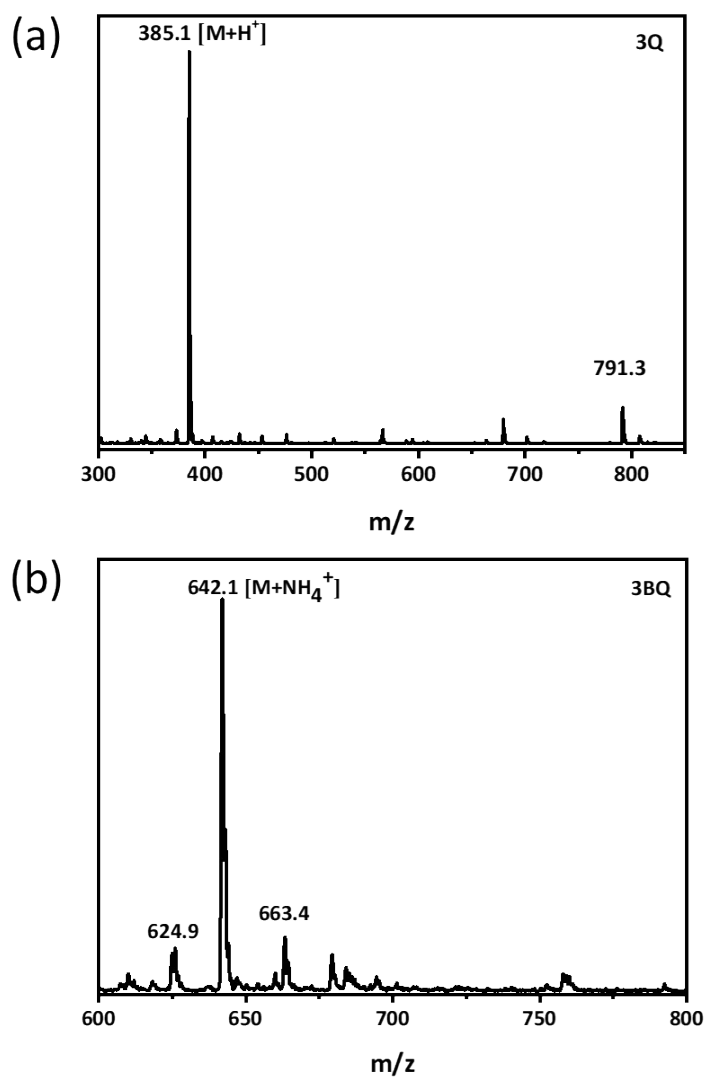

Fig. S1. The ESI-MS spectra of (a) **3Q** and (b) **3BQ**.

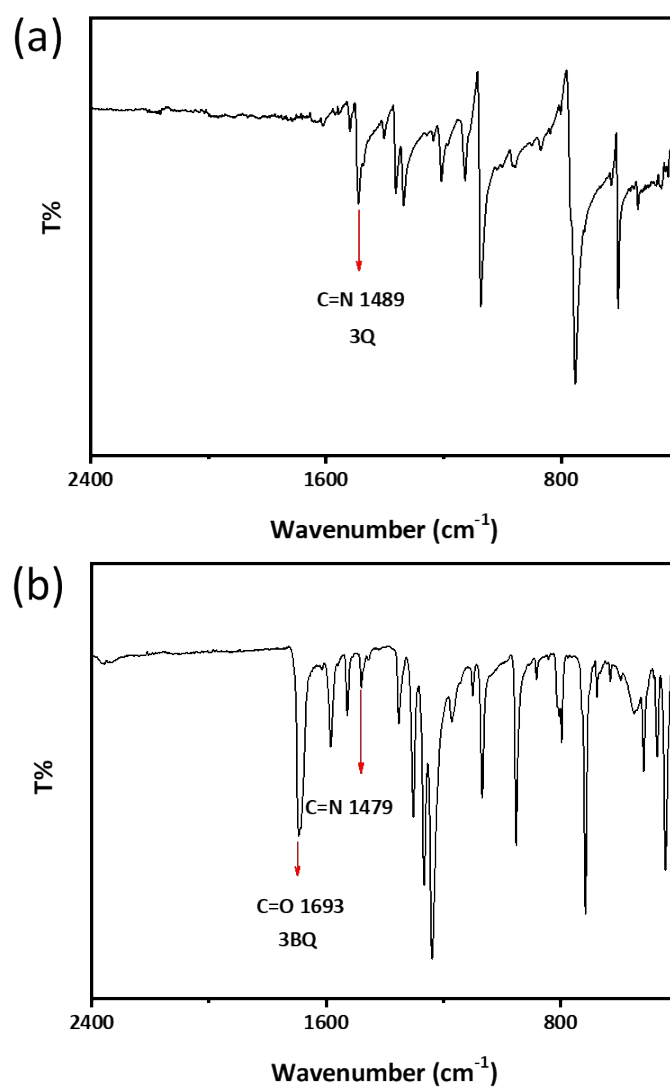

Fig. S2. The FTIR spectrums of (a) 3Q and (b) 3BQ.

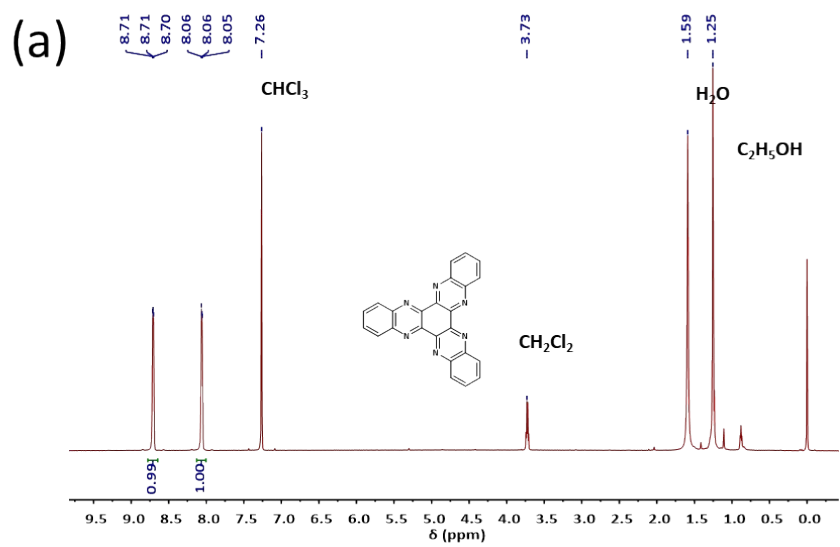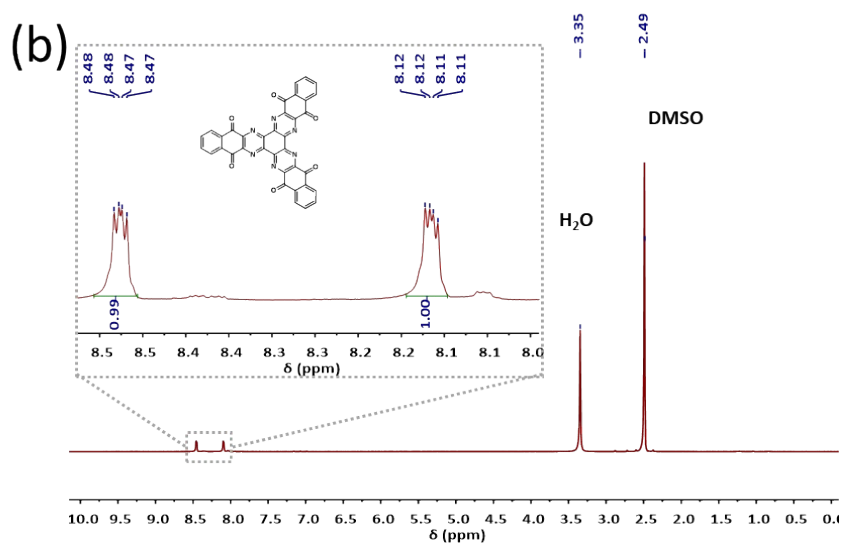

Fig. S3. The  $^1\text{H}$  NMR spectra of (a) **3Q** ( $\text{CDCl}_3$ ) and (b) **3BQ** ( $\text{DMSO}-d_6$ ).

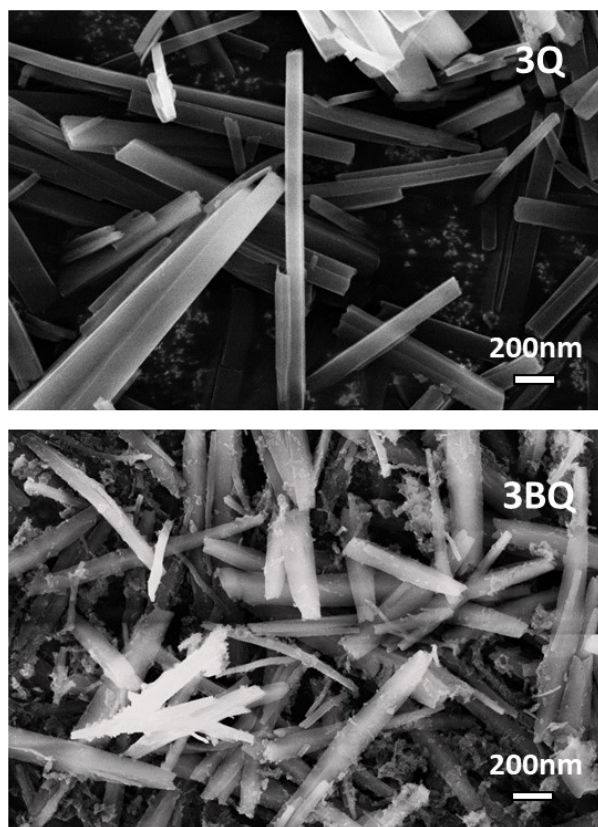

**Fig. S4.** SEM images of 3Q and 3BQ.

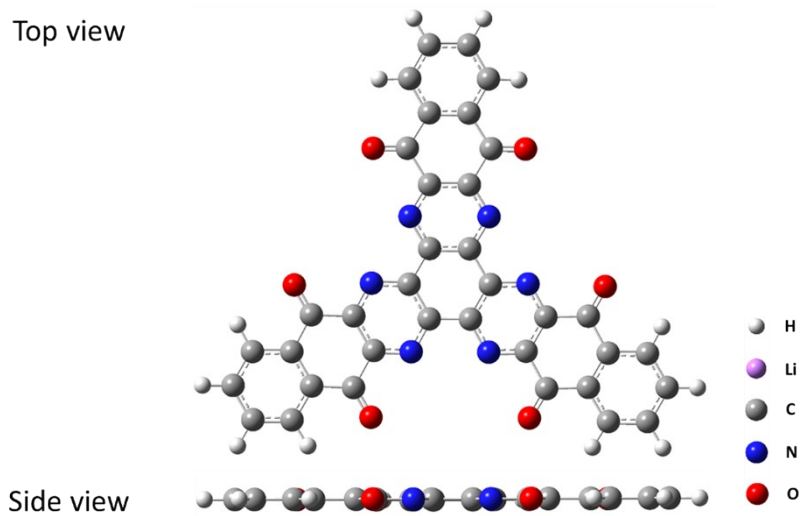

Fig. S5. Schematic of the optimized structure of **3BQ**.

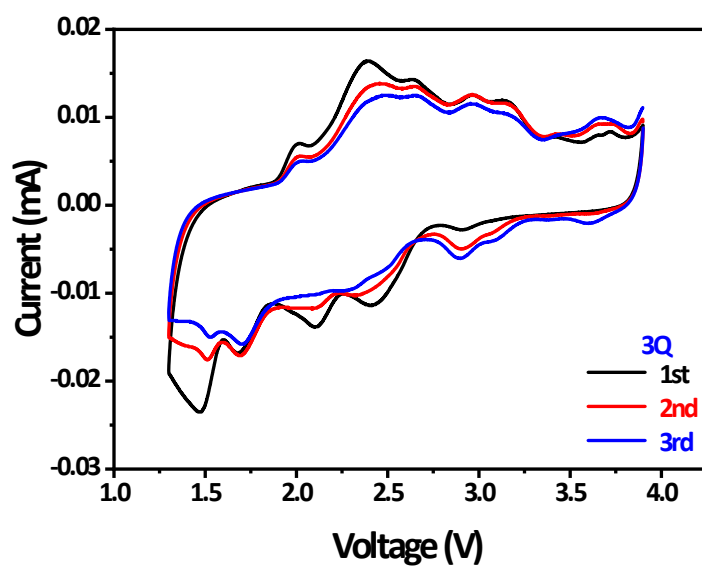

Fig. S6. CV curve of **3Q** at a scan rate of  $0.2 \text{ mV s}^{-1}$ .



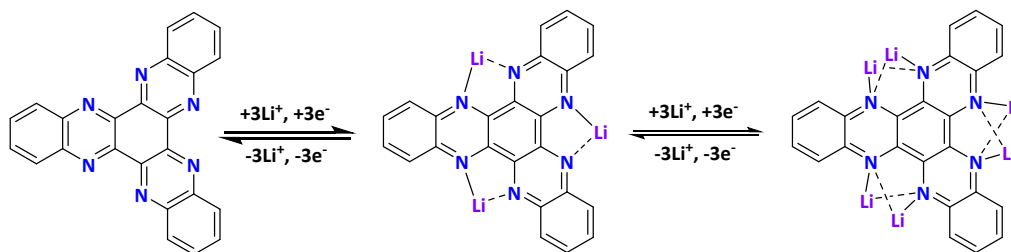

Fig. S7. The electrochemical redox mechanism of 3Q.<sup>1</sup>

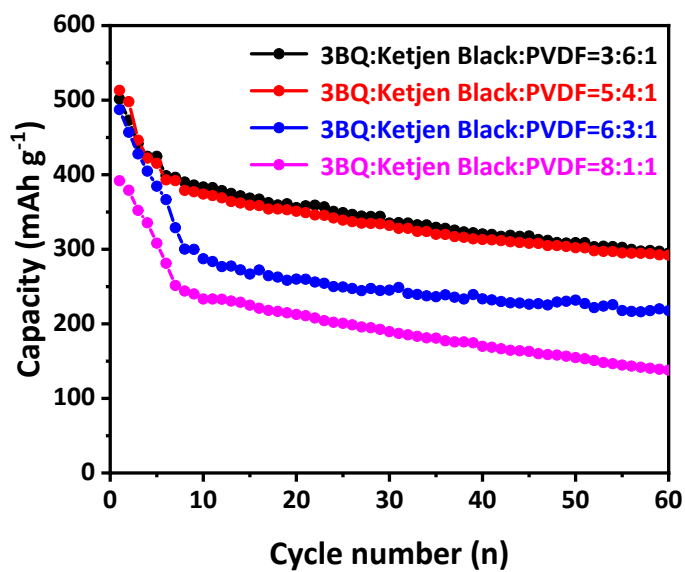

Fig. S8. Cycle performance of 3BQ with different Ketjen Black content at 0.2 C.

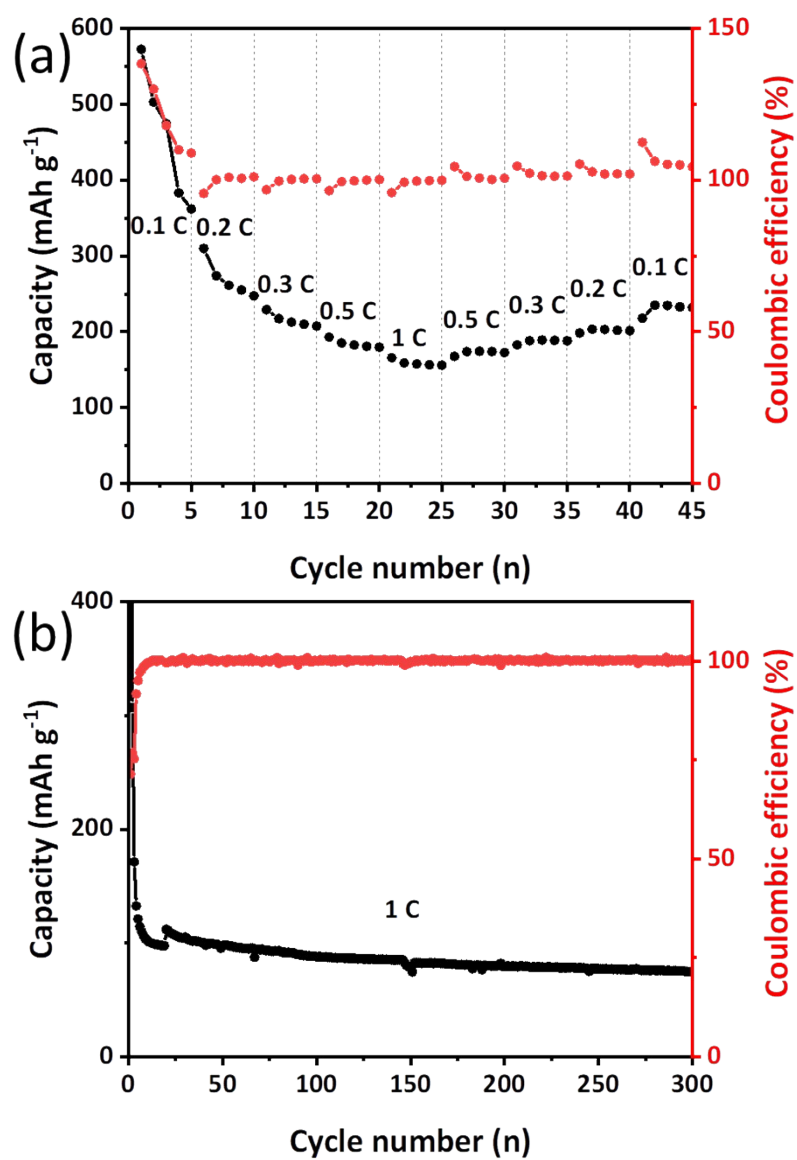

**Fig. S9.** Electrochemical performance of **3BQ** cathode in Li-ion half-cell between 1.3 and 3.9 V (vs Li/Li<sup>+</sup>) in 1 M LiTFSI in DOL/DME (1:1, v/v). (a) Rate performance at different current densities; (b) cycling performance at 1 C.

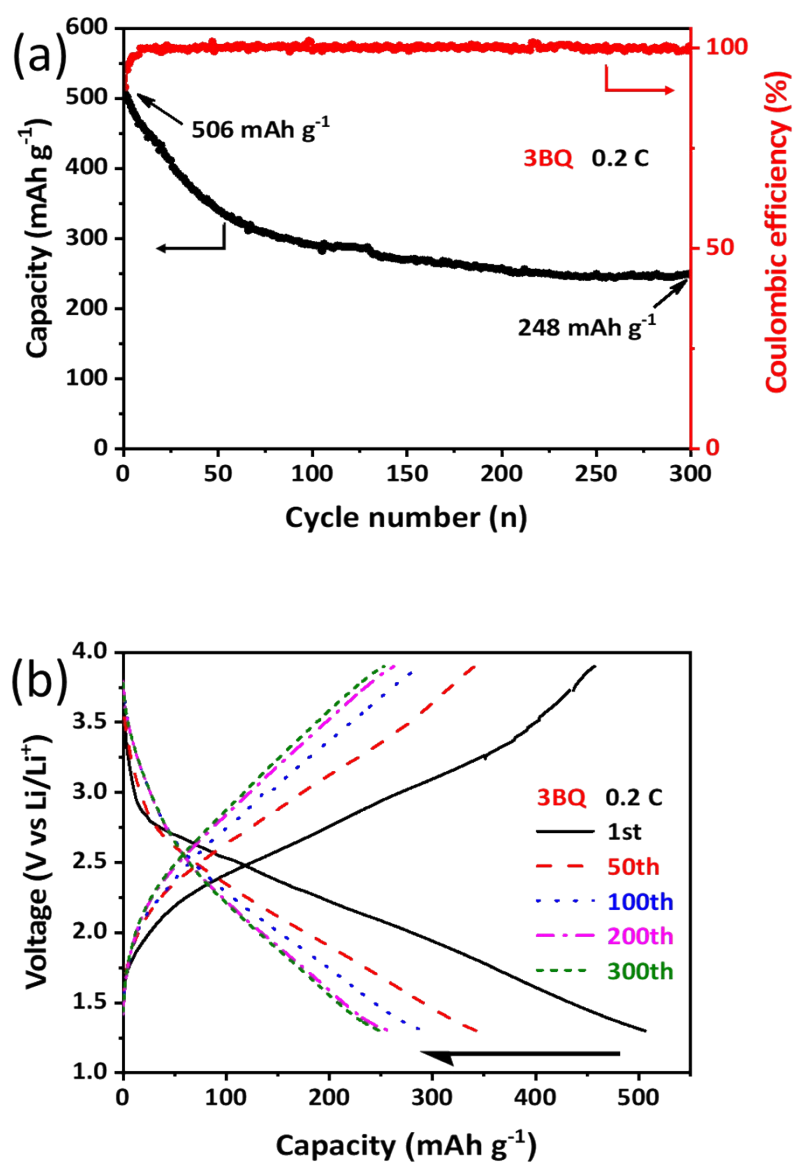

Fig. S10. (a) Cycle performance and (b) charge-discharge curves of 3BQ cathode at 0.2 C.

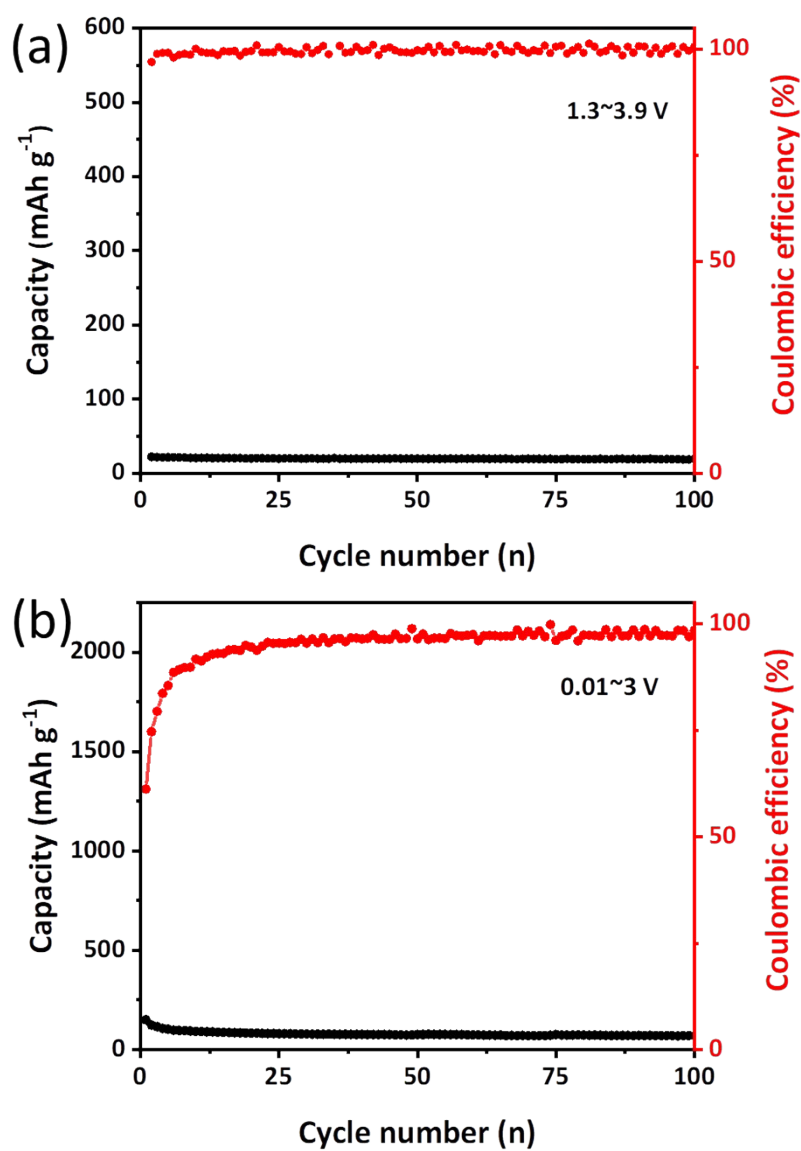

Fig. S11. Cyclic performance of Ketjen Black in different voltage ranges (Ketjen Black : PVDF = 9:1).

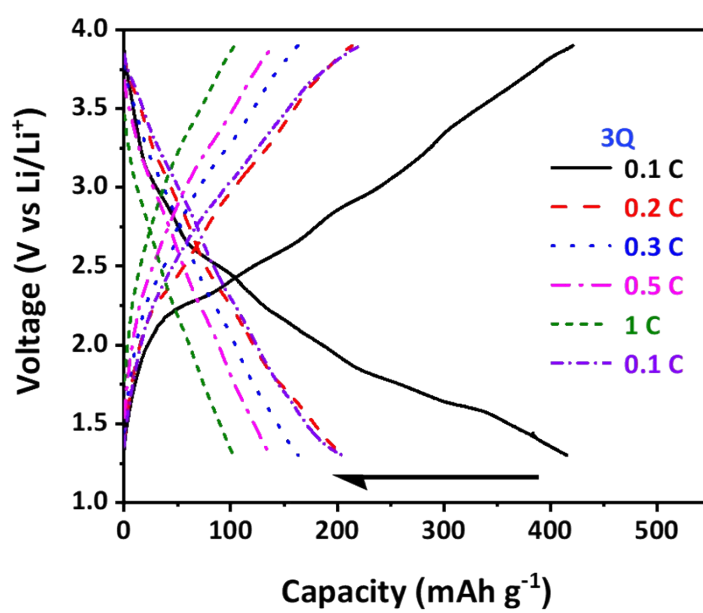

Fig. S12. Charge-discharge curves of 3Q at different rates.

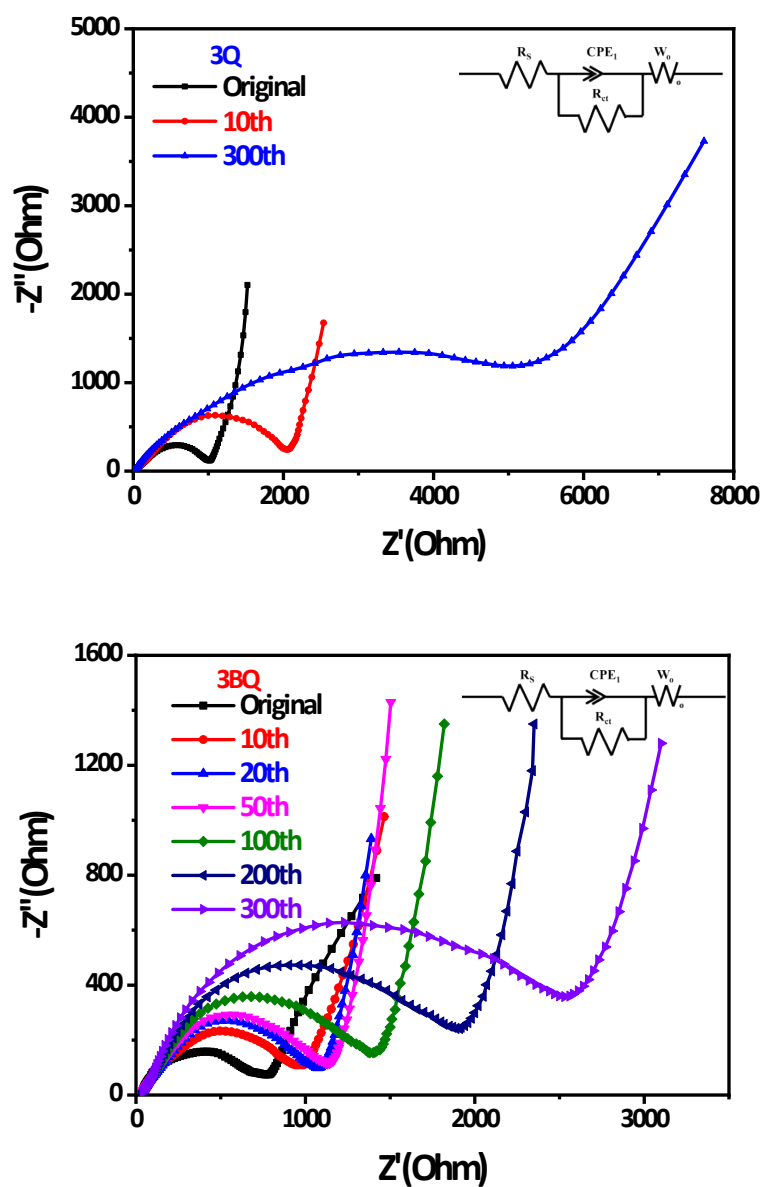

Fig. S13. The Nyquist plots of 3Q and 3BQ as cathodes during the cycles. Insets are the corresponding equivalent circuit,  $R_{ct}$  is the charge-transfer resistance,  $W_o$  is the Warburg impedance and  $CPE_1$  is the double-layer capacitance.

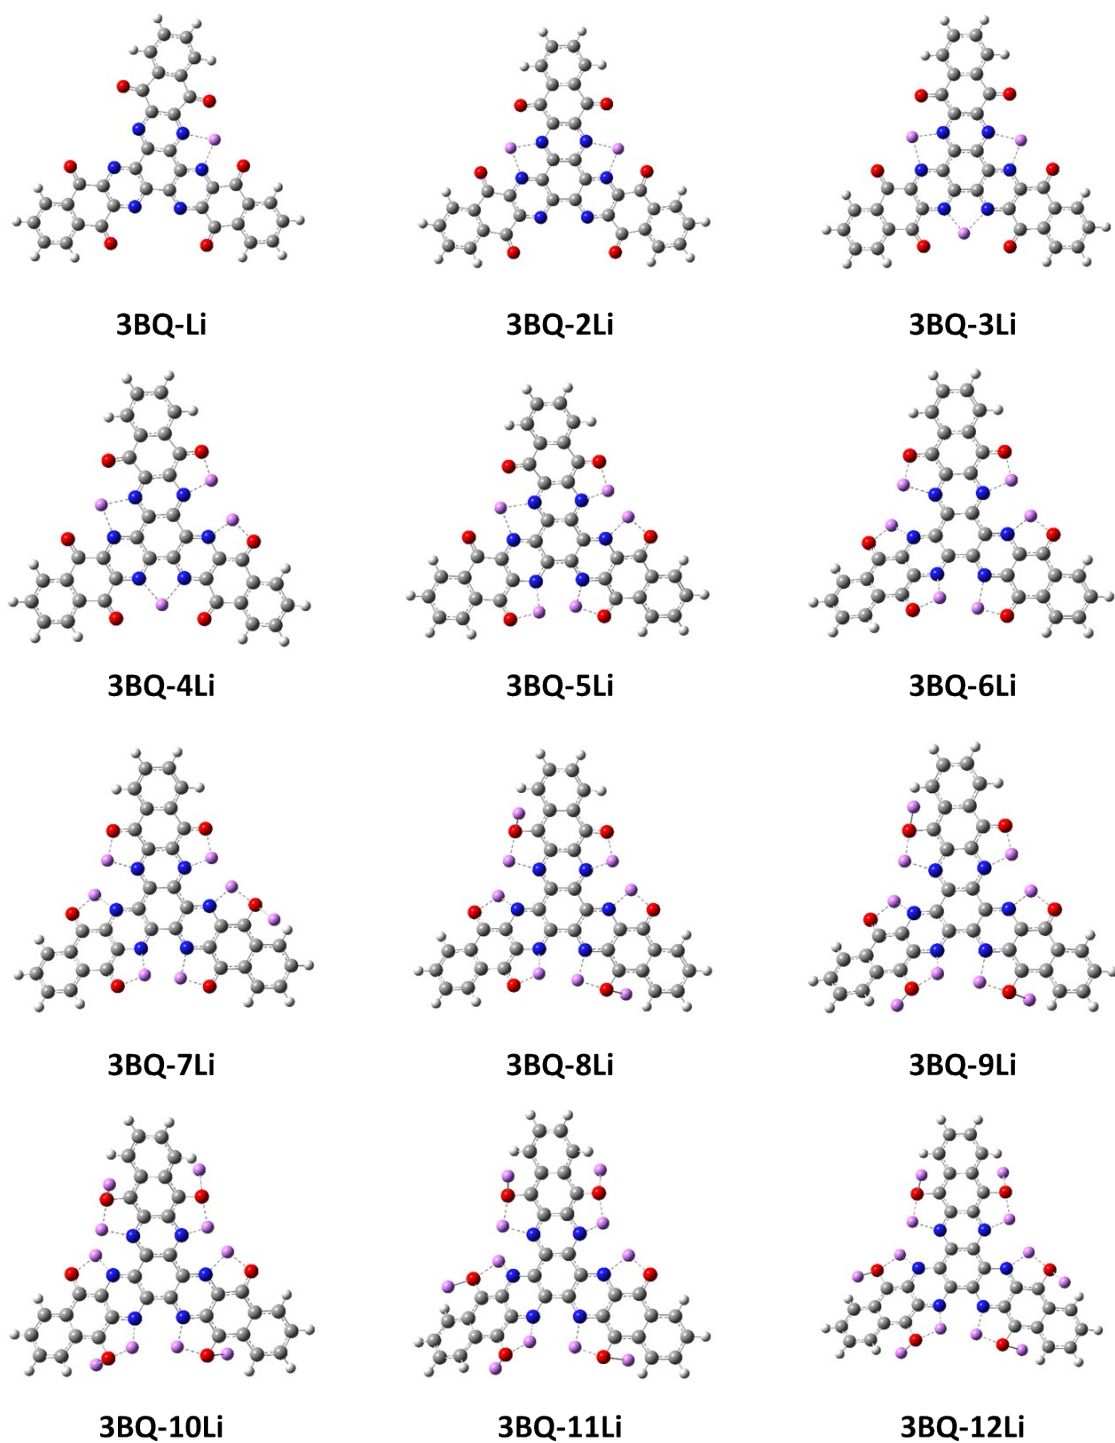

**Fig. S14.** The optimized structure of 3BQ-xLi ( $x=1\sim 12$ ) based on DFT calculation at the B3LYP/6-311G (d, p).

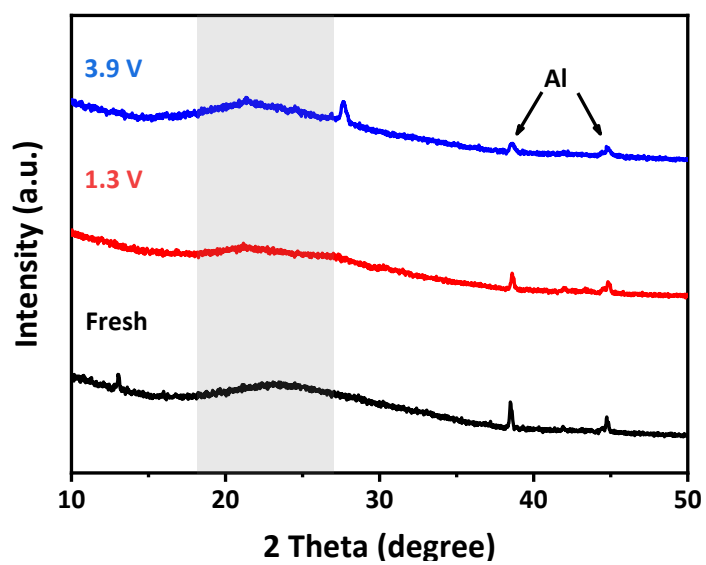

Fig. S15. Ex-situ XRD patterns of 3BQ cathode at different states.

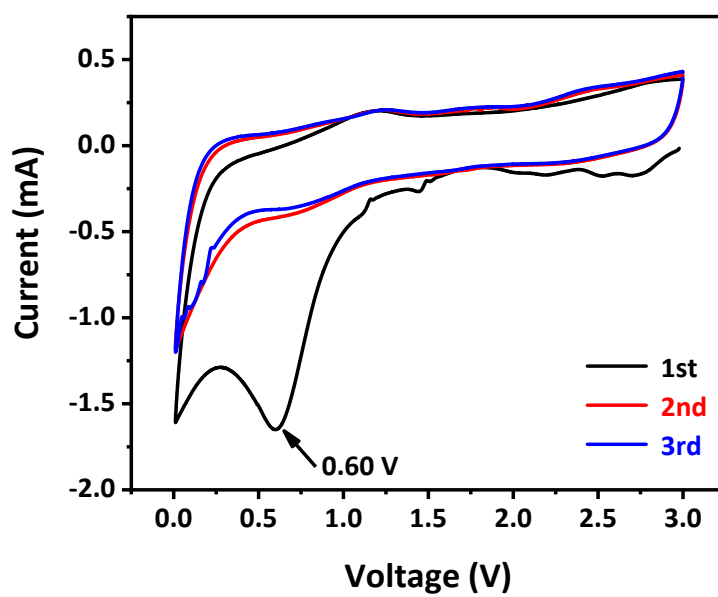

Fig. S16. The CV curves of 3BQ anode in the voltage range of 0.01~3 V at a scan rate of 0.2 mV s<sup>-1</sup>.



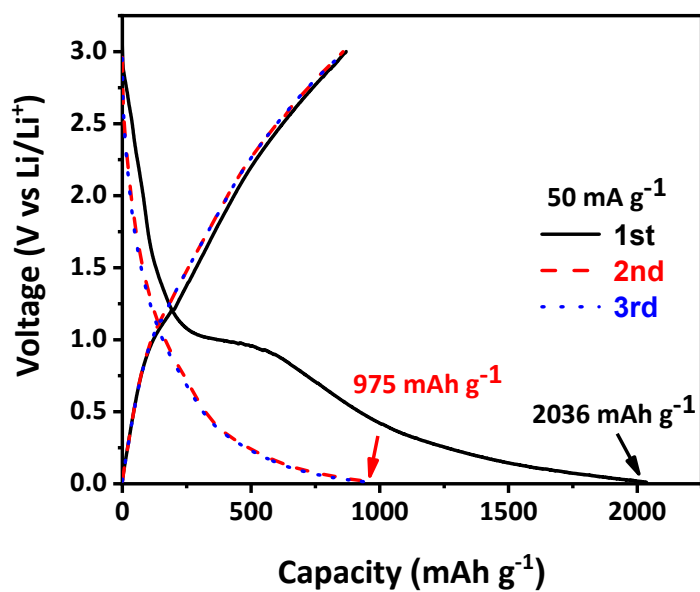

Fig. S17. The charge-discharge curves of **3BQ** anode in the initial 3 cycles at a current density of  $50 \text{ mA g}^{-1}$ .

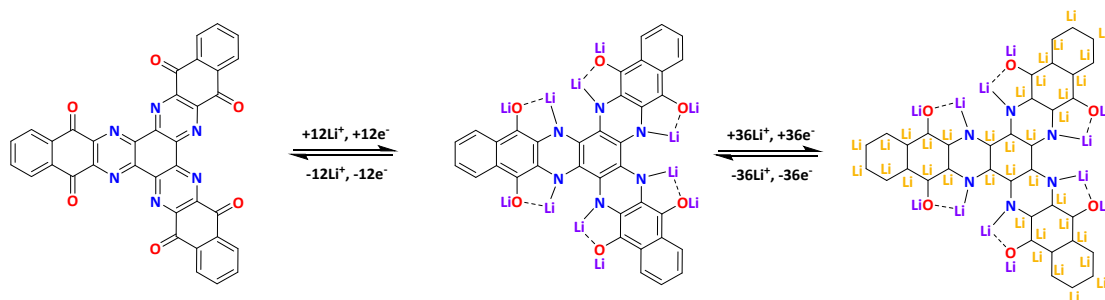

Fig. S18. Proposed superlithiation reaction mechanism of **3BQ** anode.

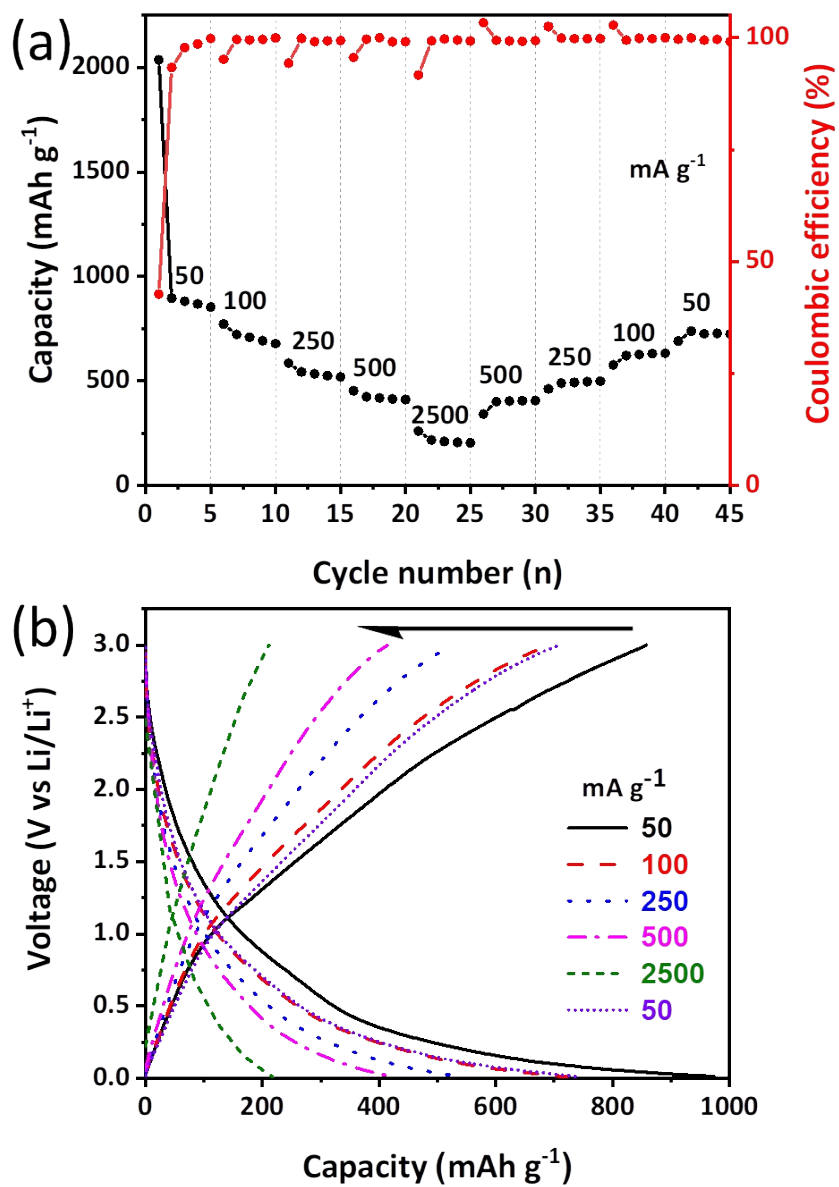

Fig. S19. (a) Rate performance and (b) charge-discharge curves of 3BQ anode at different current densities.

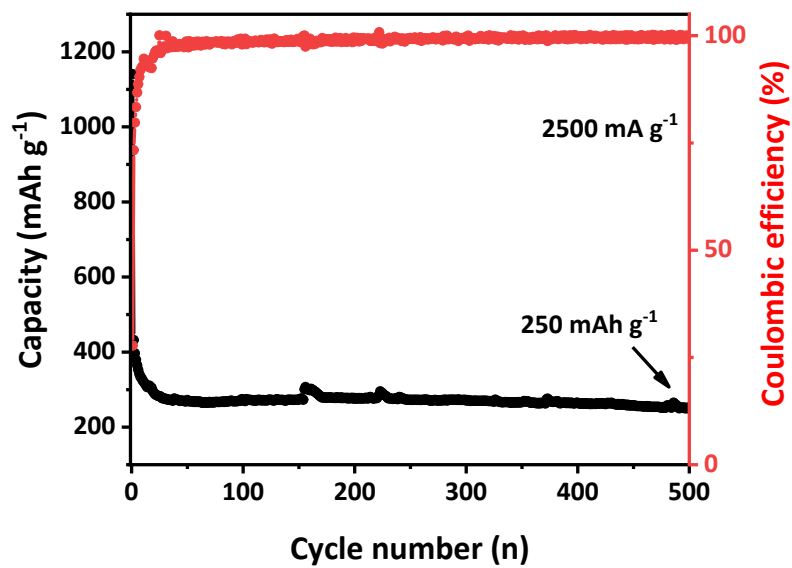

Fig. S20. Cycle performance of 3BQ anode at  $2500 \text{ mA g}^{-1}$  for 500 cycles.

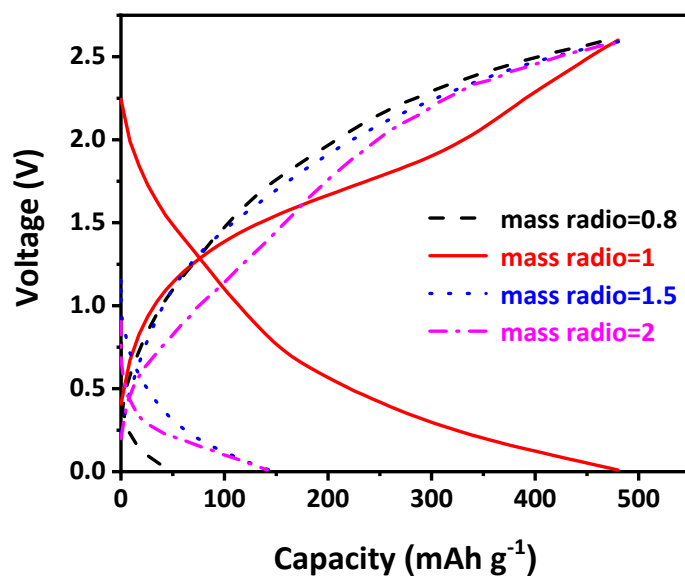

Fig. S21. Charge-discharge curves at different mass ratios of anode and cathode at 0.2 C.

**Table S1.** Comparison of electrochemical performance of other organic cathodes.

| Molecular structure                                                                 | Cathode composition                    | Mass ratio    | Electrolytes                     | Initial capacity       | Capacity (mAh g <sup>-1</sup> )                 | Ref. |
|-------------------------------------------------------------------------------------|----------------------------------------|---------------|----------------------------------|------------------------|-------------------------------------------------|------|
|                                                                                     |                                        |               |                                  | (mAh g <sup>-1</sup> ) | <sup>1</sup> /Cycle number/<br>/Current density |      |
| 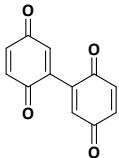   | BBQ:graphene:PVDF                      | 60:30:10      | 1 M LiTFSI in DOL/DME            | 293/0.1                | 149/100/0.1                                     | 2    |
|    | C4Q:SuperP:PVDF                        | 60:25:15      | 1 M LiPF <sub>6</sub> in EC/DMC  | 427/0.1                | 28/50/0.1                                       | 3    |
|    | P5Q:Carbon Black:PVDF                  | 30:60:10      | 4.2 M LiTFSI in AN               | 405/0.2                | 310/900/0.2                                     | 4    |
|   | C <sub>6</sub> Q <sub>6</sub> :KB:PVDF | 50:40:10      | 0.3 M LiTFSI in [PY13] [TFSI]    | 902/0.02               | 239/200/0.5                                     | 5    |
|  | ABBOH:CMK-3/SP/La133                   | 4:4:1:1       | 3 M LiTFSI in DOL/DME            | --                     | 194/250/0.2                                     | 6    |
|  | DANQ:SP:PVDF                           | 60:30:10      | 1 M LiTFSI in DME/DIOX           | 250/0.2                | 248/500/0.2                                     | 7    |
|  | C6Q:KB:PVDF                            | 60:30:10      | 1 M LiPF <sub>6</sub> in EC/DMC  | 423/0.1                | 216/100/0.1<br>195/300/0.1                      | 8    |
|  | 6CN:KB:PTFE                            | 48.1:47.9:3.5 | PEO membranes                    | 300/0.2                | 250/30/0.2                                      | 9    |
|  | HATNTA:GO:PVDF                         | 50:40:10      | 1 M LiPF <sub>6</sub> in EC/DEC. | 226/0.16               | 193/90/0.2                                      | 10   |
|  | 2Q:RGO:PVDF                            | 30:60:10      | 1 M LiTFSI in DOL/DME            | 372/1                  | 359/200/1                                       | 1    |

|                                                                                    |                   |          |                                                                  |         |              |              |
|------------------------------------------------------------------------------------|-------------------|----------|------------------------------------------------------------------|---------|--------------|--------------|
| 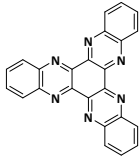  | 3Q:RGO:PVDF       | 30:60:10 | 1 M LiTFSI in DOL/DME                                            | 395/1   | 222/10000/20 | 1            |
|   | HATNTI-Pr:KB:PVDF | 60:30:10 | 1 M LiTFSI in DOL/TEGDME                                         | 317/0.1 | 254/0.1/100  | 11           |
|   | HATN:GO:PVDF      | 50:40:10 | 1 M LiPF <sub>6</sub> in EC/DEC.                                 | 410/0.1 | 226/90/0.1   | 10           |
|   | 3BQ:KB:PVDF       | 50:40:10 | 1 M LiPF <sub>6</sub> in EC/DMC                                  | 506/0.2 | 248/300/0.2  | This<br>work |
|  | HATAQ:KB:PVDF     | 30:60:10 | 1 M LiTFSI in DOL/DME(1/2<br>V/V) with 0.3 wt% LiNO <sub>3</sub> | 426/0.4 | 209/1000/19  | 12           |

**Table S2.** The total energies and the binding energies ( $\Delta E$ ) in Hartree (eV) calculated at the B3LYP/6-311G (d, p)

level in EC/DMC solvent.

| Spin state | Energy<br>(eV $\times 10^4$ ) | Reaction processes              | $\Delta E = E_{xLi} - (E_{(x-1)Li} + E_{Li(0)})$ |
|------------|-------------------------------|---------------------------------|--------------------------------------------------|
| 3BQ        | -2159.2299<br>(-5.8756)       |                                 |                                                  |
| 3BQ-1Li    | -2166.8894<br>(-5.8965)       | 3BQ $\rightarrow$ 3BQ-1Li       | -0.1497<br>(-4.0217)                             |
| 3BQ-2Li    | -2174.5395<br>(-5.9173)       | 3BQ-1Li $\rightarrow$ 3BQ-2Li   | -0.1403<br>(-3.8173)                             |
| 3BQ-3Li    | -2182.2044<br>(-5.9382)       | 3BQ-2Li $\rightarrow$ 3BQ-3Li   | -0.1551<br>(-4.2206)                             |
| 3BQ-4Li    | -2189.8247<br>(-5.9589)       | 3BQ-3Li $\rightarrow$ 3BQ-4Li   | -0.1103<br>(-3.0011)                             |
| 3BQ-5Li    | -2197.4541<br>(-5.9797)       | 3BQ-4Li $\rightarrow$ 3BQ-5Li   | -0.1105<br>(-3.0076)                             |
| 3BQ-6Li    | -2205.0745<br>(-6.0004)       | 3BQ-5Li $\rightarrow$ 3BQ-6Li   | -0.0908<br>(-2.4709)                             |
| 3BQ-7Li    | -2212.6751<br>(-6.0211)       | 3BQ-6Li $\rightarrow$ 3BQ-7Li   | -0.0829<br>(-2.2545)                             |
| 3BQ-8Li    | -2220.2678<br>(-6.0417)       | 3BQ-7Li $\rightarrow$ 3BQ-8Li   | -0.0829<br>(-2.2559)                             |
| 3BQ-9Li    | -2227.1716<br>(-6.0606)       | 3BQ-8Li $\rightarrow$ 3BQ-9Li   | -0.0606<br>(-1.6490)                             |
| 3BQ-10Li   | -2235.4240<br>(-6.0830)       | 3BQ-9Li $\rightarrow$ 3BQ-10Li  | -0.0743<br>(-2.0219)                             |
| 3BQ-11Li   | -2242.9947<br>(-6.1036)       | 3BQ-10Li $\rightarrow$ 3BQ-11Li | -0.0609<br>(-1.6572)                             |
| 3BQ-12Li   | -2250.5603<br>(-6.1242)       | 3BQ-11Li $\rightarrow$ 3BQ-12Li | -0.0558<br>(-1.5184)                             |

 $E_{Li(0)} = -7.5098$  Hartree

**Table S3.** Sum of electronic and thermal Gibb free energies in Hartree (eV) of optimized structures and the redox potentials (V) calculated at the B3LYP/6-311G (d, p) level in EC/DMC solvent.

| Spin state | Energy<br>(eV×10 <sup>4</sup> ) | Reaction processes | Calculated potential (V vs. Li/Li <sup>+</sup> ) |
|------------|---------------------------------|--------------------|--------------------------------------------------|
| 3BQ        | -2159.2944<br>(-5.8759)         |                    |                                                  |
| 3BQ-1Li    | -2166.9558<br>(-5.8967)         | 3BQ→3BQ-1Li        | 3.7589                                           |
| 3BQ-2Li    | -2174.6061<br>(-5.9175)         | 3BQ-1Li→3BQ-2Li    | 3.4584                                           |
| 3BQ-3Li    | -2182.2733<br>(-5.9384)         | 3BQ-2Li→3BQ-3Li    | 3.9172                                           |
| 3BQ-4Li    | -2189.8926<br>(-5.9591)         | 3BQ-3Li→3BQ-4Li    | 2.6121                                           |
| 3BQ-5Li    | -2197.5188<br>(-5.9799)         | 3BQ-4Li→3BQ-5Li    | 2.8035                                           |
| 3BQ-6Li    | -2205.1397<br>(-6.0006)         | 3BQ-5Li→3BQ-6Li    | 2.6576                                           |
| 3BQ-7Li    | -2212.7440<br>(-6.0213)         | 3BQ-6Li→3BQ-7Li    | 2.2038                                           |
| 3BQ-8Li    | -2220.3379<br>(-6.0420)         | 3BQ-7Li→3BQ-8Li    | 1.9232                                           |
| 3BQ-9Li    | -2227.9281<br>(-6.0626)         | 3BQ-8Li→3BQ-9Li    | 1.8236                                           |
| 3BQ-10Li   | -2235.4936<br>(-6.0832)         | 3BQ-9Li→3BQ-10Li   | 1.1502                                           |
| 3BQ-11Li   | -2243.0638<br>(-6.1038)         | 3BQ-10Li→3BQ-11Li  | 1.2780                                           |
| 3BQ-12Li   | -2250.6307<br>(-6.1244)         | 3BQ-11Li→3BQ-12Li  | 1.1882                                           |

$E_{Li(0)} = -7.5232$  Hartree

**Table S4.** Comparison of electrochemical performance of other all-organic batteries.

| Molecular structure                                                                 | Cathode composition                                                   | Mass ratio  | Electrolytes                               | Initial capacity (mAh g <sup>-1</sup> ) | Capacity (mAh g <sup>-1</sup> ) <sup>1</sup> /Cycle number/<br>/Current density | Ref.      |
|-------------------------------------------------------------------------------------|-----------------------------------------------------------------------|-------------|--------------------------------------------|-----------------------------------------|---------------------------------------------------------------------------------|-----------|
| 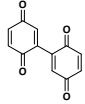   | BBQ:CMK-3:GO:La133                                                    | 40:50:10:10 | 1 M LiTFSI in DOL/DME                      | 316/1                                   | ~80/1000/2                                                                      | 13        |
|    | ABB <sub>4</sub> OLi:CMK-3:SP:La133                                   | 40:40:10:10 | 3 M LiTFSI in DOL/DME                      | 282/0.2                                 | 63/200/0.2                                                                      | 6         |
|    | Li <sub>4</sub> C <sub>8</sub> H <sub>2</sub> O <sub>6</sub> :CB:PVDF | 65:30:5     | 1 M LiPF <sub>6</sub> in EC/DMC            | 223/0.1                                 | 212/50/0.1                                                                      | 14        |
|   | PDB:CNTs:PVDF                                                         | 30:50:20    | 1 M LiTFSI in DOL/DME                      | 249/0.06                                | 119/250/3                                                                       | 15        |
|  | PI1:KB:PVDF                                                           | 40:40:20    | 1 M LiPF <sub>6</sub> in EC/DMC            | 77/0.2                                  | 72/1000/0.2                                                                     | 16        |
|  | TCAQ:SP:PVDF                                                          | 40:55:5     | 1 m LiClO <sub>4</sub> in EC/DMC (3/7 v/v) | 105/1                                   | 71/250/1                                                                        | 17        |
|  | Poly-BQ1:SP:PVDF                                                      | 50:40:10    | 1 M LiTFSI in DOL/DME                      | 351.5/0.1                               | 203.4/400/2                                                                     | 18        |
|  | 3BQ:KB:PVDF                                                           | 50:40:10    | 1 M LiPF <sub>6</sub> in EC/DMC            | 483/0.2                                 | 172/300/0.2                                                                     | This work |



**Equation S1.** Lithium ion diffusion coefficient for **3Q** and **3BQ**.

$$D = \frac{R^2 T^2}{2A^2 n^4 F^4 C^2 \sigma^2}$$

where A is the surface area of the electrode, n is the number of the electrons per molecule attending the electronic transfer reaction, F is the Faraday constant, C is the concentration of lithium ion in electrode, R is the gas constant, T is the room temperature in our experiment,  $\sigma$  is the slope of the line  $Z' \sim \omega^{-1/2}$  which can be obtained from the line of  $Z' \sim \omega^{-1/2}$ , respectively.

## References

- 1 C. Peng, G. Ning, J. Su, G. Zhong, W. Tang, B. Tian, C. Su, D. Yu, L. Zu, J. Yang, M. Ng, Y. Hu, Y. Yang, M. Armand and K. Loh, *Nat. Energy*, 2017, **2**, 17074.
- 2 J. Yang, P. Xiong, Y. Shi, P. Sun, Z. Wang, Z. Chen and Y. Xu, *Adv. Funct. Mater.*, 2020, **30**, 1909597.
- 3 S. Zheng, J. Hu and W. Huang, *Inorg. Chem. Front.*, 2017, **4**, 1806.
- 4 W. Zhang, H. Sun, P. Hu and W. Huang, *EcoMat*, 2021, 1.
- 5 Y. Lu, X. Hou, L. Miao, L. Li, R. Shi, L. Li, and J. Chen, *Angew. Chem. Int. Ed.*, 2019, **58**, 7020.
- 6 Y. Hu, W. Tang, Q. Yu, C. Yang and C. Fan, *ACS Appl. Mater. Inter.*, 2019, **58**, 32987.
- 7 J. Lee, H. Kim and M. Park, *Chem. Mater.*, 2016, **28**, 2408.
- 8 X. Zhang, W. Zhou, M. Zhang, Z. Yang and W. Huang, *J. Energy Chem.*, 2021, **52**, 28.
- 9 Y. Hanyu, T. Sugimoto, Y. Ganbe, A. Masuda and I. Honma, *J. Electrochem. Soc.*, 2013, **161**, A6.
- 10 J. Wang, K. Tee, Y. Lee, S.N. Riduan and Y. Zhang, *J. Mater. Chem. A*, 2018, **6**, 2752.
- 11 Z. Wang, Q. Qi, W. Jin, X. Zhao, X. Huang and Y. Li, *ChemSusChem*, 2021, **14**, 3858.
- 12 M. Wu, N. Lu, T. Chen, H. Lyu, T. Huang, S. Dai, X. Sun, A. Ivanov, J. Lee, I. Popovs and W. Kaveevitchai, *Adv. Energy. Mater.*, 2021, **11**, 2100330.
- 13 Z. Yao, W. Tang, X. Wang, C. Wang, C. Yang and C. Fan, *J. Power Sources*, 2020, **448**, 227456.
- 14 S. Wang, L. Wang, K. Zhang, Z. Zhu, Z. Tao and J. Chen, *Nano Lett.*, 2013, **13**, 4404.
- 15 J. Xie, Z. Wang, Z. Xu and Q. Zhang, *Adv. Energy. Mater.*, 2018, **8**, 1703509.
- 16 N. Casado, D. Mantione, D. Shanmukaraj and D. Mecerreyes, *ChemSusChem*, 2020, **13**, 2464.
- 17 A. Wild, M. Strumpf, B. Häupler, M. Hager and U. Schubert, *Adv. Energy. Mater.*, 2017, **7**, 1601415.
- 18 Y. Zhao, M. Wu, H. Chen, J. Zhu, J. Liu, Z. Ye, Y. Zhang, H. Zhang, Y. Ma, C. Li and Y. Chen, *Nano Energy*, 2021, **86**, 106055.
